# Supplementary material
Source: PubMed Central journal article supplement (PMC4143996)
Supplement: peds.2013-3501_peds.2013-3501SupplementaryData.pdf [file peds.2013-3501_peds.2013-3501SupplementaryData.pdf]

## Supplemental Information

**SUPPLEMENTAL TABLE 1** Fluoride Pharmacokinetics in a Toddler

|        | Time <sub>elapsed</sub> (min) | Vol <sub>urine</sub> (mL) | Cr <sub>urine</sub> (mg) | Flow <sub>urine</sub> (mL/min) <sup>a</sup> | F <sub>urine</sub> (μg) | [F] <sub>plasma</sub> (μg/L) <sup>b</sup> | Time <sub>mid</sub> (min) <sup>a</sup> |
|--------|-------------------------------|---------------------------|--------------------------|---------------------------------------------|-------------------------|-------------------------------------------|----------------------------------------|
| Diaper |                               |                           |                          |                                             |                         |                                           |                                        |
| FT1    | 20                            | 43                        | 11.7                     | 0.36                                        | <i>4.3</i>              | 20                                        | 10                                     |
| FT2    | 90                            | 46                        | 10.6                     | 0.43                                        | 28                      | 25                                        | 74                                     |
| FT3    | 50                            | 34                        | 4.7                      | 0.70                                        | 9.3                     | 18                                        | 152                                    |
| FT4    | 30                            | 15                        | 1.9                      | 0.76                                        | 2.8                     | 14                                        | 186                                    |
| FT5,6  | 60                            | 33                        | 5.3                      | 0.61                                        | 9.7                     | 17                                        | 223                                    |
| FC1    | 40                            | 22                        | 3.1                      | 0.76                                        | 2.2                     | 6.8                                       | 15                                     |
| FC2    | 40                            | 55                        | 5.9                      | 1.00                                        | 7.9                     | 13                                        | 58                                     |
| FC3    | 90                            | 24                        | 2.8                      | 0.92                                        | 3.0                     | 10                                        | 101                                    |
| FC4    | 10                            | 73                        | 7.9                      | 0.99                                        | 9.9                     | 12                                        | 153                                    |
| FC5    | 110                           | 51                        | 10.2                     | 0.53                                        | 7.0                     | 6.4                                       | 241                                    |

FT, treatment diaper; FC, control diaper.

Excessively high urine creatinine in the first diaper after treatment indicated 95 min of urinary holding before varnish application. Urine fluoride for this time-point was corrected (italics) by removing the amount of fluoride built up during this amount of time in the control day.

<sup>a</sup> Time corrected by urine creatinine.

<sup>b</sup> Estimated from urine fluoride using the previous study<sup>21</sup> as in Fig 1.
